# Supplementary material
Source: Research Square preprint supplement (doi:10.21203/rs.3.rs-9153120/v1)
Supplement: Supplementary file 1 [file 2a3bbaa2b9a78402fefef8e2.docx]

**Table 1.** Summary of field trial information

| **Trial Code** | **Location** | **Year** | **Latitude/**  **Longitude** | **Set** | **Date of**  **Planting** | **In-crop average Minimum/Max Temperature (0C)** | **Rainfall (mm)** | **Water Management** |
| --- | --- | --- | --- | --- | --- | --- | --- | --- |
| EME17 | Emerald | 2017 | -23.53, 148.18 | All | 25-Jan-17 | 21.1/33.8 | 278 | Rainfed |
| EME18 | Emerald | 2018 | -23.53, 148.18 | Early | 30-Jan-18 | 21.3/33.5 | 242 | Rainfed |
| EME18 | Emerald | 2018 | -23.53, 148.18 | Mid | 30-Jan-18 | 21.3/33.5 | 242 | Rainfed |
| EME18 | Emerald | 2018 | -23.53, 148.18 | Late | 29-Jan-18 | 21.2/33.4 | 242 | Rainfed |
| HER18 | Hermitage | 2018 | -28.21, 152.10 | Early | 11-Jan-18 | 16.6/30.1 | 285 | Irrigated |
| HER18 | Hermitage | 2018 | -28.21, 152.10 | Mid | 11-Jan-18 | 16.5/30 | 285 | Irrigated |
| HER18 | Hermitage | 2018 | -28.21, 152.10 | Late | 20-Dec-17 | 16.9/30.7 | 341 | Irrigated |
| GAT23 | Gatton | 2023 | -27.56, 152.34 | All | 22-Dec-22 | 18.1/32.2 | 115 | Irrigated |
