# Supplementary material
Source: Research Square preprint supplement (doi:10.21203/rs.3.rs-9153120/v1)
Supplement: Supplementary file 2 [file 549348c9dae6e4444be997d5.docx]

## Multivariate Genomic Best Linear Unbiased Prediction (GBLUP) Can Improve Genomic Prediction in Mungbean

Mark Edward Fabreaga, Shanice Van Haeftena, Cassandra Peggb, Eric Dinglasana,Millicent Smitha,c, Valeria Paccapelod, Thomas Nobled,Merrill Ryand, Lee Hickeya, Ben J. Hayesa

a Queensland Alliance for Agriculture and Food Innovation, The University of Queensland, St. Lucia, QLD, Australia

b Agriculture and Food, CSIRO, St. Lucia, QLD, Australia

c School of Agriculture & Food Sustainability, The University of Queensland, St. Lucia, QLD, Australia

d Department of Primary Industries, Warwick, QLD, Australia

*Corresponding Author:* Ben Hayes, [b.hayes@uq.edu.au](mailto:b.hayes@uq.edu.au)


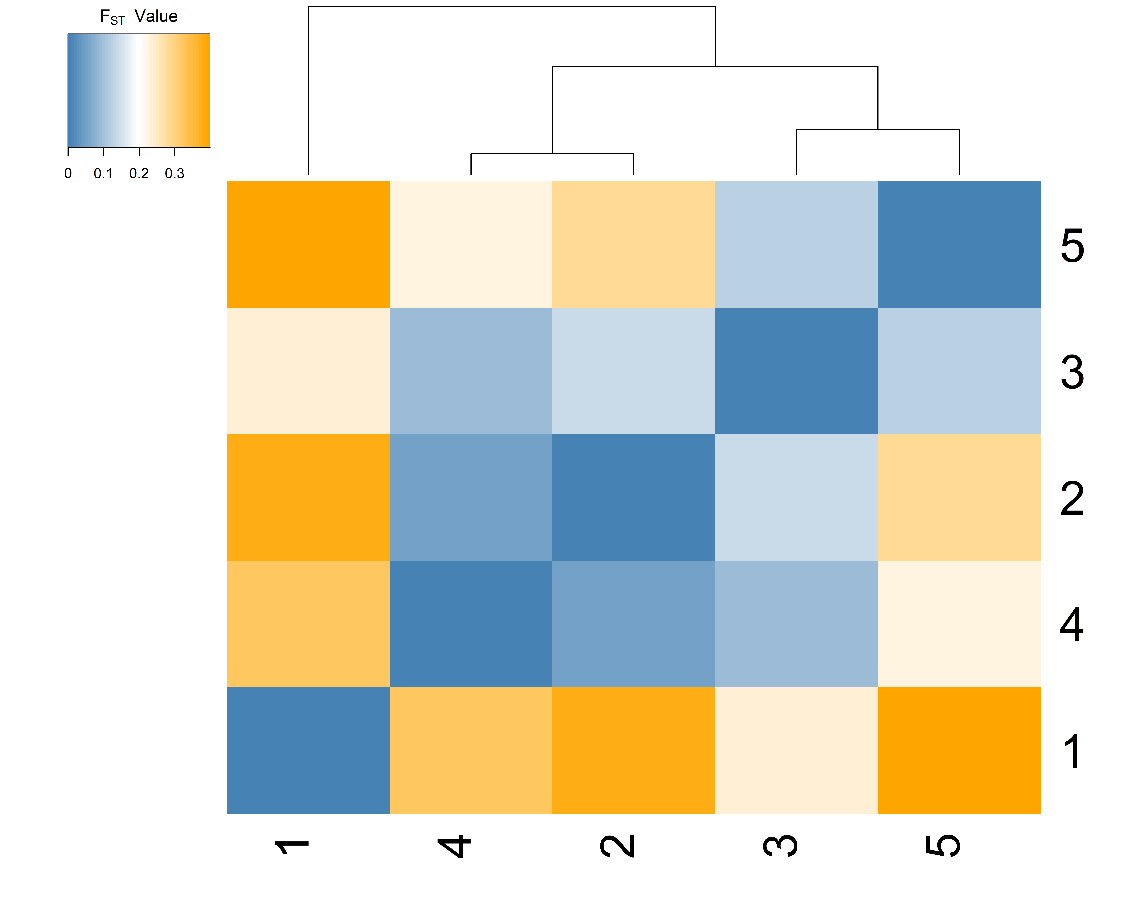


**Supp Fig. 1** Fixation index (FST) between DAPC clusters


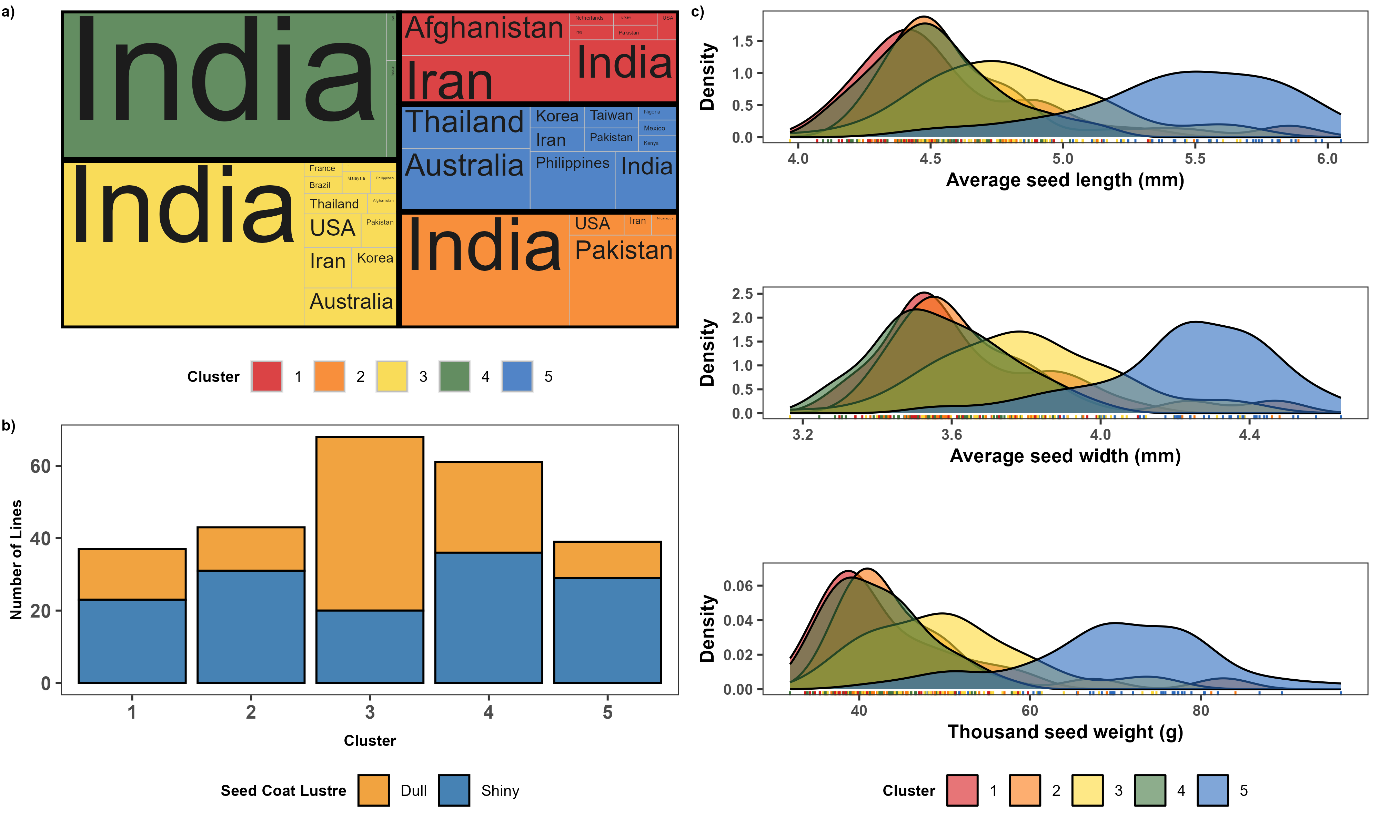


**Supp Fig. 2** Comparisons of clusters according to a) geographic origin, b) seed coat lustre, and c) average seed length, average seed width and thousand seed weight


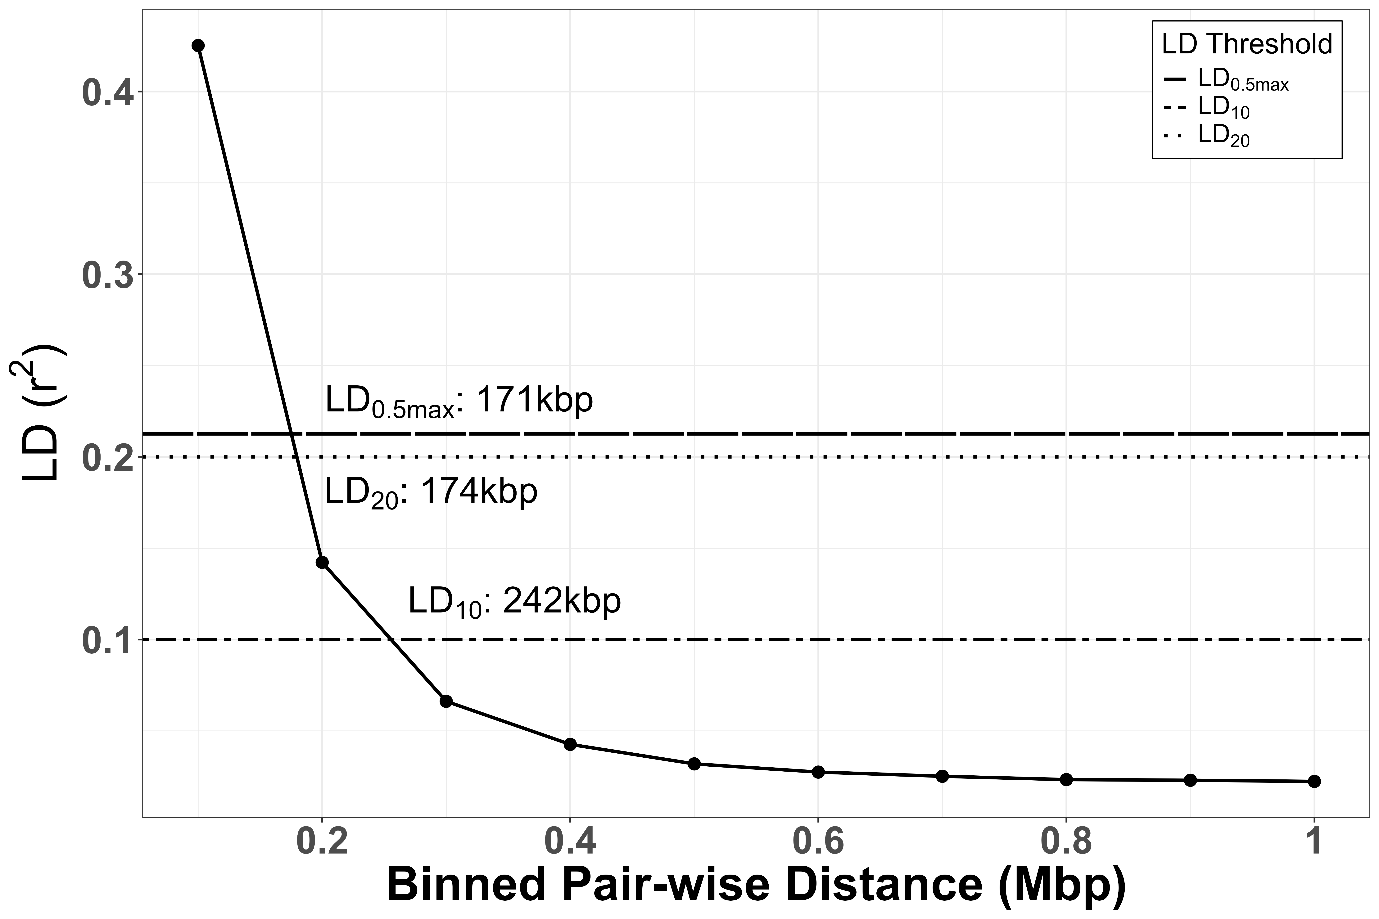


**Supp Fig. 3** LD based on the mean of r2 between SNP markers calculated per interval of100kb pairwise SNP distance. This was calculated based on the genotype data of 313 Mini-Core Plus Panel on 3, 310 SNP markers. LD decay based on three measures are shown


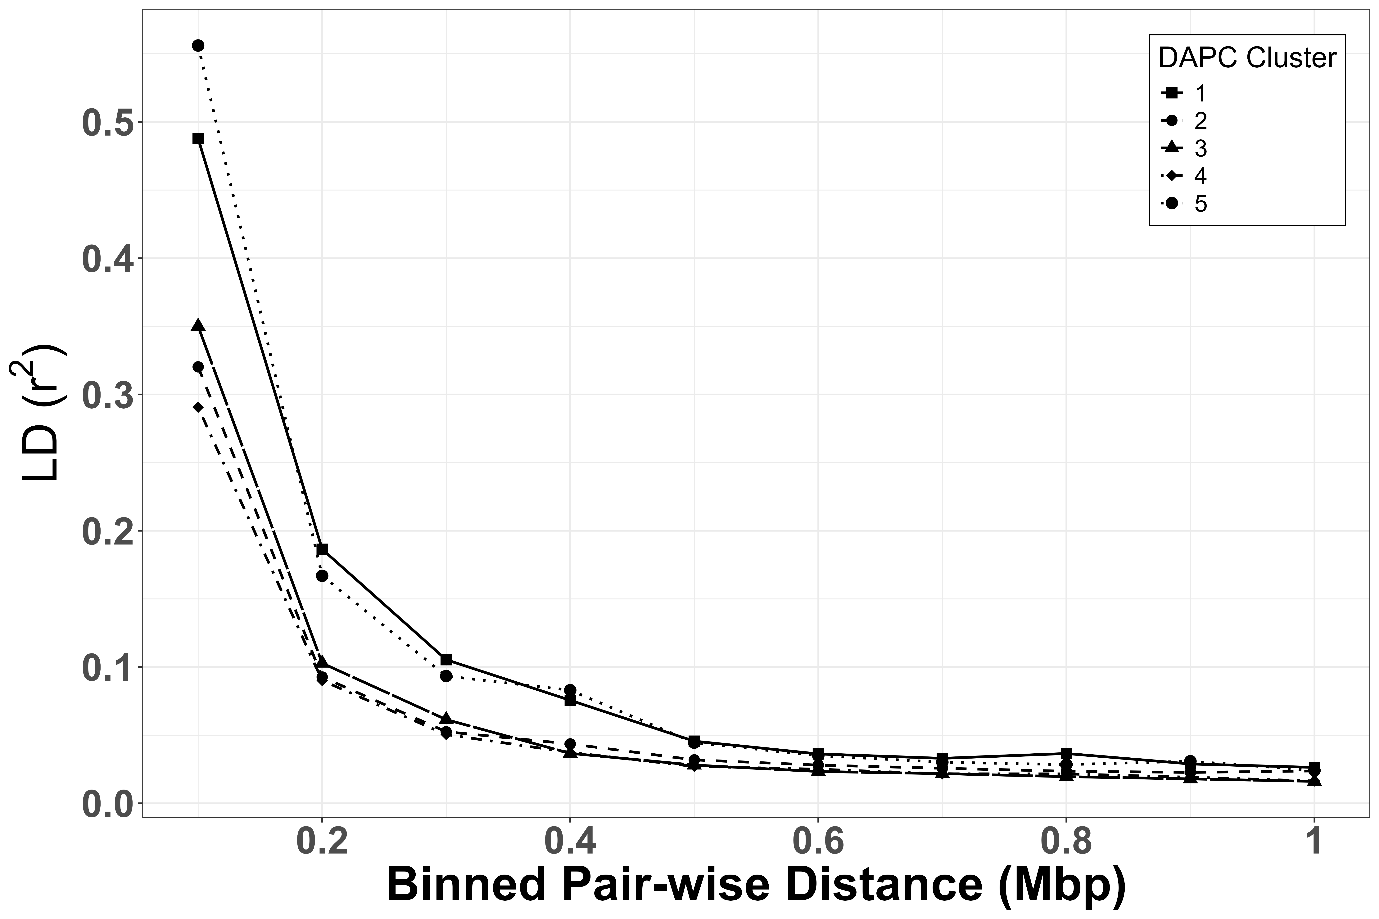


**Supp Fig. 4** Change in LD (r2) with distance among lines within DAPC clusters
