# Supplementary material
Source: Research Square preprint supplement (doi:10.21203/rs.3.rs-9153120/v1)
Supplement: Supplementary file 3 [file ef24aabf186a2bb19cc32874.docx]

**Table 3.** Trait heritability estimates in each and across environments

| **Trait**a | **Environment**b | **Narrow-sense Heritability** (*h2*) | **Broad-sense Heritability** (*H2*) |
| --- | --- | --- | --- |
| YLD | EME17 | 0.41 | 0.66 |
|  | EME18 | 0.58 | 0.87 |
|  | HER18 | 0.51 | 0.89 |
|  | GAT23 | 0.68 | 0.76 |
|  | Across Trials | 0.62 | 0.66 |
| DTF | EME17 | 0.77 | 0.77 |
|  | EME18 | 0.66 | 0.89 |
|  | HER18 | 0.96 | 0.96 |
|  | GAT23 | 0.93 | 0.93 |
|  | Across Trials | 0.88 | 0.94 |
| PHT | EME17 | 0.59 | 0.74 |
|  | EME18 | 0.45 | 0.79 |
|  | HER18 | 0.54 | 0.79 |
|  | Across Trials | 0.64 | 0.74 |

a YLD, yield; DTF, days to 50% flowering; PHT, plant height

b EME17, Emerald 2017; EME18, Emerald 2018; HER18, Hermitage 2018; GAT23, Gatton 2023
