# Supplementary material
Source: Research Square preprint supplement (doi:10.21203/rs.3.rs-9153120/v1)
Supplement: Supplementary file 4 [file f73fb2490747fba19d0093d3.docx]

**Table 2.** Number of mungbean accessions in each environment and number of accessions common between environmentsa

|  | **EME17** | **EME18 Early** | **EME18 Medium** | **EME18 Late** | **HER18 Early** | **HER18 Medium** | **HER18 Late** | **GAT23** |
| --- | --- | --- | --- | --- | --- | --- | --- | --- |
| **EME17** | 306/285b |  |  |  |  |  |  |  |
| **EME18 Early** | 75/68 | 77/70 |  |  |  |  |  |  |
| **EME18 Medium** | 93/87 | 3/3 | 107/100 |  |  |  |  |  |
| **EME18 Late** | 137/133 | 3/3 | 3/3 | 142/138 |  |  |  |  |
| **HER18 Early** | 75/68 | 77/70 | 3/3 | 3/3 | 77/70 |  |  |  |
| **HER18 Medium** | 93/87 | 3/3 | 107/100 | 3/3 | 3/3 | 107/100 |  |  |
| **HER18 Late** | 138/134 | 3/3 | 3/3 | 142/138 | 3/3 | 3/3 | 143/139 |  |
| **GAT23** | 273/270 | 68/67 | 90/90 | 135/133 | 68/67 | 90/90 | 136/134 | 300/297 |

a The diagonal contains the total number of accessions within an environment, while the off diagonal refers to the number of accessions common between environments

b Numbers are reported as total number of accessions tested/total number of accessions tested with genomic data
